# Supplementary material
Source: PubMed Central journal article supplement (PMC4417391)
Supplement: NIHMS672572-supplement-1.pdf [file NIHMS672572-supplement-1.pdf]

Supplemental Table 1: Fold change in lung metabolites from uninfected CD, LFD, HFD mice and at 4 and 8 days post-infection<sub>1</sub>

| Time Point       | Comparison | Metabolite Species    | Metabolite                   | Fold Change | p value  |
|------------------|------------|-----------------------|------------------------------|-------------|----------|
| Day 0<br>(naive) | HFD/CD     | Amino Acid            | p-Cresol Sulfate             | 4.93        | 0.010032 |
|                  |            | Fatty Acid/Eicosanoid | Butyrylcarnitine             | 2.09        | 0.001060 |
|                  |            | Fatty Acid/Eicosanoid | L-Acetylcarnitine            | 1.75        | 0.000940 |
|                  |            | Fatty Acid/Eicosanoid | 11Z-Octadecenylcarnitine     | 2.37        | 0.001580 |
|                  |            | Fatty Acid/Eicosanoid | 15(S)-HETE                   | 0.33        | 0.003817 |
|                  |            | Indole                | Indoleacrylic acid           | 1.81        | 0.004640 |
|                  |            | Nucleotide            | Guanosine monophosphate      | 3.81        | 0.003523 |
|                  |            | Phospholipid          | Lysophospholipid (8)         | 1.5         | 0.000010 |
|                  |            | Phospholipid          | Phosphatidylcholine          | 1.15        | 0.023580 |
|                  |            | Steroid/Cholesterol   | Cholesteryl ester            | 1.91        | 0.000360 |
|                  |            | Steroid/Cholesterol   | Taurallocholic acid          | 1.11        | 0.029120 |
|                  |            | Steroid/Cholesterol   | Hyochoolic acid              | 4.93        | 0.002543 |
|                  |            | TCA Cycle             | Pantothenic Acid             | 1.57        | 0.050193 |
|                  | HFD/LFD    | Amino Acid            | L-Tryptophan                 | 0.75        | 0.024349 |
|                  |            | Amino Acid            | p-Cresol sulfate             | 0.54        | 0.000839 |
|                  |            | Amino Acid            | Sulfolithocholylglycine      | Only in HFD | 0.032456 |
|                  |            | Amino Acid/Ketone     | 4-Hydroxy-2-oxoglutaric acid | 0.77        | 0.005082 |
|                  |            | Carbohydrate          | Threonic acid                | 0.74        | 0.000676 |
|                  |            | Fatty Acid/Eicosanoid | 11Z-Octadecenylcarnitine     | 1.3         | 0.032900 |
|                  |            | Fatty Acid/Eicosanoid | L-Acetylcarnitine            | 0.72        | 0.055300 |
|                  |            | Fatty Acid/Eicosanoid | Linoelaidyl carnitine        | 3.14        | 0.000000 |
|                  |            | Fatty Acid/Eicosanoid | L-Palmitoylcarnitine         | 1.52        | 0.013900 |
|                  |            | Fatty Acid/Eicosanoid | Monoacylglyceride            | 1.3         | 0.031200 |
|                  |            | Fatty Acid/Eicosanoid | Monoacylglyceride            | 0.51        | 0.045700 |
|                  |            | Indole                | Indoleacrylic acid           | 0.73        | 0.047200 |
|                  |            | Nucleotide            | 8-Oxo-dGTP                   | 2.47        | 0.015625 |
|                  |            | Nucleotide            | Cytidine 2'-phosphate        | 0.81        | 0.021372 |
|                  |            | Nucleotide            | Uridine triphosphate         | 2.27        | 0.025340 |
|                  |            | Phospholipid          | Lysophospholipid (7)         | 1.98        | 0.000100 |
|                  |            | Phospholipid          | Lysophospholipid (2)         | 0.69        | 0.003800 |
|                  |            | Phospholipid          | Phosphatidylcholine (3)      | 1.73        | 0.000300 |
|                  |            | Phospholipid          | Phosphatidylcholine (2)      | 0.83        | 0.004700 |
|                  |            | Steroid/Cholesterol   | 12-Ketodeoxycholic acid      | 0.79        | 0.051700 |
|                  |            | Steroid/Cholesterol   | Taurallocholic acid          | 88.99       | 0.025386 |
|                  |            | TCA Cycle             | D-Malic acid                 | 0.8         | 0.054900 |
|                  | LFD/CD     | Amino Acid            | p-Cresol sulfate             | 9.21        | 0.007654 |
|                  |            | Fatty Acid/Eicosanoid | Linoelaidyl carnitine        | 1.4         | 0.000946 |
|                  |            | Fatty Acid/Eicosanoid | 15(S)-HETE                   | 0.18        | 0.000142 |
|                  |            | Nucleotide            | Guanosine monophosphate      | 4.02        | 0.012926 |
|                  |            | Phospholipid          | Lysophosphatidylethanolamine | 1.23        | 0.017168 |

|       |                       |                       |                                       |                                                 |                        |          |
|-------|-----------------------|-----------------------|---------------------------------------|-------------------------------------------------|------------------------|----------|
|       |                       | Steroid/Cholesterol   | Taurallocholic acid                   | Only in CD                                      | 0.046767               |          |
| Day 4 | HFD/CD                | Amino Acid            | Glutaminy-Proline                     | 6.01                                            | 0.000111               |          |
|       |                       | Amino Acid            | p-Cresol sulfate                      | 53.66                                           | 0.000057               |          |
|       |                       | Fatty Acid/Eicosanoid | 3-Hydroxy-9Z-octadecenoylcarnitine    | 2.7                                             | 0.003400               |          |
|       |                       | Fatty Acid/Eicosanoid | Monoacylglyceride                     | 1.97                                            | 0.019480               |          |
|       |                       | Fatty Acid/Eicosanoid | 4-Hydroxyisovaleric acid              | 2.47                                            | 0.000093               |          |
|       |                       | Fatty Acid/Eicosanoid | Arachidonic acid                      | 2.03                                            | 0.002542               |          |
|       |                       | Nucleotide            | Adenine                               | 1.25                                            | 0.007230               |          |
|       |                       | Nucleotide            | Deoxyguanosine                        | 1.28                                            | 0.004000               |          |
|       |                       | Nucleotide            | 8-Hydroxy-deoxyguanosine              | 1.67                                            | 0.003830               |          |
|       |                       | Nucleotide            | Guanosine monophosphate               | 3.69                                            | 0.004201               |          |
|       |                       | Phospholipid          | Lysophospholipid                      | 1.32                                            | 0.018120               |          |
|       |                       | Phospholipid          | Lysophospholipid (5)                  | 0.28                                            | 0.000022               |          |
|       |                       | Phospholipid          | Phosphatidylcholine (9)               | 2.44                                            | 0.000000               |          |
|       |                       | Phospholipid          | Phosphatidylethanolamine (2)          | 0.64                                            | 0.000079               |          |
|       |                       | Steroid/Cholesterol   | Tetrahydrocortisol                    | 9.18                                            | 0.044979               |          |
|       |                       | TCA Cycle             | D-Malic acid                          | 1.4                                             | 0.031450               |          |
|       |                       | TCA Cycle             | Pantothenic acid                      | 2.2                                             | 0.000856               |          |
|       |                       |                       | HFD/LFD                               | Nucleotide                                      | Adenosine 2'-phosphate | 1.68     |
|       |                       | Phospholipid          |                                       | Lysophospholipid (2)                            | 1.75                   | 0.004100 |
|       |                       | Phospholipid          |                                       | Lysophospholipid (2)                            | 0.71                   | 0.013900 |
|       |                       | Phospholipid          |                                       | Phosphatidylcholine (2)                         | 1.41                   | 0.001000 |
|       |                       | Phospholipid          |                                       | Phosphatidylcholine (2)                         | 0.77                   | 0.012300 |
|       |                       | LFD/CD                | Amino Acid                            | Glutaminy-Proline                               | 6.3                    | 0.001583 |
|       |                       |                       | Amino Acid                            | p-Cresol sulfate                                | 29.95                  | 0.000117 |
|       |                       |                       | Carbohydrate                          | 3-Methoxy-4-hydroxyphenylethyleneglycol sulfate | Only in CD             | 0.000000 |
|       |                       |                       | Fatty Acid/Eicosanoid                 | 11-Octadecenylcarnitine                         | 1.85                   | 0.032764 |
|       |                       |                       | Fatty Acid/Eicosanoid                 | 3-Hydroxy-9Z-octadecenoylcarnitine              | 2.28                   | 0.000160 |
|       |                       |                       | Fatty Acid/Eicosanoid                 | 9-Hexadecenoylcarnitine                         | 1.89                   | 0.003522 |
|       |                       |                       | Fatty Acid/Eicosanoid                 | 4-Hydroxyisovaleric acid                        | 2.36                   | 0.016748 |
|       | Fatty Acid/Eicosanoid |                       | Arachidonic acid                      | 1.96                                            | 0.027829               |          |
|       | Indole                |                       | Indoleacrylic acid                    | 0.83                                            | 0.013153               |          |
|       | Ketone                |                       | 3-Hydroxybutyric acid                 | 3.22                                            | 0.024728               |          |
|       | Phospholipid          |                       | Lysophosphatidylethanolamine (LysoPE) | 0.78                                            | 0.003308               |          |
|       | TCA Cycle             |                       | Pantothenic acid                      | 1.78                                            | 0.001082               |          |
|       | TCA Cycle             |                       | Pantothenic acid                      | 1.94                                            | 0.015313               |          |
| Day 8 | HFD/CD                |                       | Amino Acid                            | Glutaminy-Proline                               | 8.33                   | 0.000153 |
|       |                       | Amino Acid            | Leucinic acid                         | 4.1                                             | 0.000110               |          |
|       |                       | Amino Acid            | L-Tryptophan                          | 0.66                                            | 0.031405               |          |
|       |                       | Amino Acid            | p-Cresol sulfate                      | 10.57                                           | 0.051959               |          |
|       |                       | Carbohydrate          | 1,4-beta-D-Glucan                     | 0.79                                            | 0.053400               |          |

|         |                       |                                    |       |          |
|---------|-----------------------|------------------------------------|-------|----------|
|         | Carbohydrate          | Fructose 1,6-bisphosphate          | 0.71  | 0.003255 |
|         | Carbohydrate          | N-Glycolylneuraminic acid          | 0.67  | 0.005680 |
|         | Fatty Acid/Eicosanoid | 11Z-Octadecenylcarnitine           | 2.08  | 0.001300 |
|         | Fatty Acid/Eicosanoid | 3-Hydroxy-9Z-octadecenoylcarnitine | 2.46  | 0.033900 |
|         | Fatty Acid/Eicosanoid | 9-Hexadecenoylcarnitine            | 1.53  | 0.011300 |
|         | Fatty Acid/Eicosanoid | Hydroxybutyrylcarnitine            | 3.77  | 0.001100 |
|         | Fatty Acid/Eicosanoid | Linoelaidyl carnitine              | 1.64  | 0.001400 |
|         | Fatty Acid/Eicosanoid | L-Palmitoylcarnitine               | 1.99  | 0.004100 |
|         | Fatty Acid/Eicosanoid | Monoacylglyceride (6)              | 2.84  | 0.001100 |
|         | Fatty Acid/Eicosanoid | 3-Oxododecanoic acid               | 8.81  | 0.004067 |
|         | Fatty Acid/Eicosanoid | 4-Hydroxyisovaleric acid           | 2.91  | 0.000073 |
|         | Fatty Acid/Eicosanoid | Arachidonic acid                   | 1.47  | 0.022347 |
|         | Fatty Acid/Eicosanoid | Elaidic carnitine                  | 1.93  | 0.001976 |
|         | Fatty Acid/Eicosanoid | Monoacylglyceride (MG)             | 2.72  | 0.000394 |
|         | Fatty Acid/Eicosanoid | Oleic acid                         | 1.83  | 0.001786 |
|         | Fatty Acid/Eicosanoid | Palmitic acid                      | 1.78  | 0.021824 |
|         | Ketone                | (S)-3-Hydroxybutyric acid          | 17.51 | 0.000123 |
|         | Ketone                | 3-Hydroxybutyric acid              | 8.98  | 0.000222 |
|         | Nucleotide            | Inosine                            | 0.89  | 0.053949 |
|         | Nucleotide            | Uridine                            | 0.9   | 0.037515 |
|         | Oxidative Stress      | Oxidized glutathione               | 0.82  | 0.040813 |
|         | Phospholipid          | Glycerophosphocholine              | 7.58  | 0.000400 |
|         | Phospholipid          | Lysophospholipid (2)               | 0.48  | 0.001400 |
|         | Phospholipid          | Lysophosphatidylethanolamine       | 1.77  | 0.003500 |
|         | Phospholipid          | Phosphatidylcholine (3)            | 1.85  | 0.048600 |
|         | Phospholipid          | Phosphatidylcholine (2)            | 0.83  | 0.009900 |
|         | TCA Cycle             | Pantothenic acid                   | 1.96  | 0.002300 |
| HFD/LFD | Fatty Acid/Eicosanoid | Diglyceride                        | 0.46  | 0.004300 |
|         | Fatty Acid/Eicosanoid | Linoelaidyl carnitine              | 2.3   | 0.000500 |
|         | Fatty Acid/Eicosanoid | L-Palmitoylcarnitine               | 1.55  | 0.035800 |
|         | Fatty Acid/Eicosanoid | Monoacylglyceride                  | 1.86  | 0.009900 |
|         | Fatty Acid/Eicosanoid | Tetradecanoylcarnitine             | 1.51  | 0.035300 |
|         | Nucleotide            | N(6)-(1,2-dicarboxyethyl)AMP       | 2.18  | 0.050232 |
|         | Phospholipid          | Lysophospholipid                   | 1.75  | 0.009100 |
|         | Phospholipid          | Lysophospholipid (2)               | 0.68  | 0.011600 |
|         | Phospholipid          | Phosphatidylcholine (2)            | 1.61  | 0.007800 |
|         | Phospholipid          | Phosphatidylcholine                | 0.86  | 0.038900 |
| LFD/CD  | Amino Acid            | Glutaminy-L-Proline                | 5.45  | 0.000519 |
|         | Amino Acid            | p-Cresol sulfate                   | 11.4  | 0.000083 |
|         | Amino Acid            | Threonic acid                      | 0.6   | 0.026154 |
|         | Carbohydrate          | Lactic acid                        | 0.6   | 0.035644 |

|                       |                              |        |          |
|-----------------------|------------------------------|--------|----------|
| Carbohydrate          | Fructose 1,6-bisphosphate    | 0.51   | 0.014900 |
| Fatty Acid/Eicosanoid | 11Z-Octadecenylcarnitine     | 1.48   | 0.037698 |
| Fatty Acid/Eicosanoid | Imidazolepropionic acid      | 0.82   | 0.030614 |
| Fatty Acid/Eicosanoid | Isobutyryl-L-carnitine       | 0.54   | 0.001310 |
| Fatty Acid/Eicosanoid | Pantothenic acid             | 1.92   | 0.000229 |
| Fatty Acid/Eicosanoid | 4-Hydroxyisovaleric acid     | 2.84   | 0.045979 |
| Histidine             | N-Acetylhistamine            | 0.68   | 0.027555 |
| Ketone                | 3-Hydroxybutyric acid        | 7.18   | 0.000970 |
| Nucleotide            | Deoxyguanosine               | 0.7    | 0.023211 |
| Nucleotide            | Adenine                      | 0.56   | 0.036907 |
| Nucleotide            | Deoxyguanosine               | 0.58   | 0.044499 |
| Nucleotide            | N(6)-(1,2-dicarboxyethyl)AMP | 0.53   | 0.028694 |
| Nucleotide            | Uridine                      | 0.63   | 0.049945 |
| Nucleotide            | Uridine diphosphate glucose  | 0.47   | 0.029268 |
| Nucleotide            | Xanthine                     | 0.62   | 0.042087 |
| Oxidative Stress      | Oxidized glutathione         | 0.69   | 0.005558 |
| Oxidative Stress      | Oxidized glutathione         | 0.55   | 0.029982 |
| Phospholipid          | Glycerophosphocholine        | 6.6    | 0.000003 |
| Steroid/Cholesterol   | Taurocholic acid             | 462.51 | 0.015758 |
| Steroid/Cholesterol   | Taurallocholic acid          | 76.43  | 0.013412 |

1. Fold change for significantly altered lung metabolites between CD, LFD and HFD mice during pH1N1 infection.
